# Supplementary material for: pH-Controllable regeneration and visible-light photocatalytic redox of carbon and nitrogen co-doped Zn3Nb2O8 towards degradation of multiple contaminants
Source: Royal Society of Chemistry journal article supplement (doi:10.1039/d0cy00085j), 2020-01-01
Supplement: d0cy00085j1.pdf [file d0cy00085j1.pdf]

**Electronic Supplementary Information**

**PH-controllable Regeneration and Visible-light Photocatalytic  
Redox of Carbon and Nitrogen Codoped  $Zn_3Nb_2O_8$  towards Multiple  
Contaminants**

Ping Bai, Niri Wu, Yuanjiang Wang, Ting Yang, Hui Li, Jingyu Zhang, Zhanli Chai\*,  
Xiaojing Wang

Inner Mongolia Key Laboratory of Chemistry and Physics of Rare Earth Materials, School of  
Chemistry and Chemical Engineering, Inner Mongolia University, Inner Mongolia 010021,  
People's Republic of China

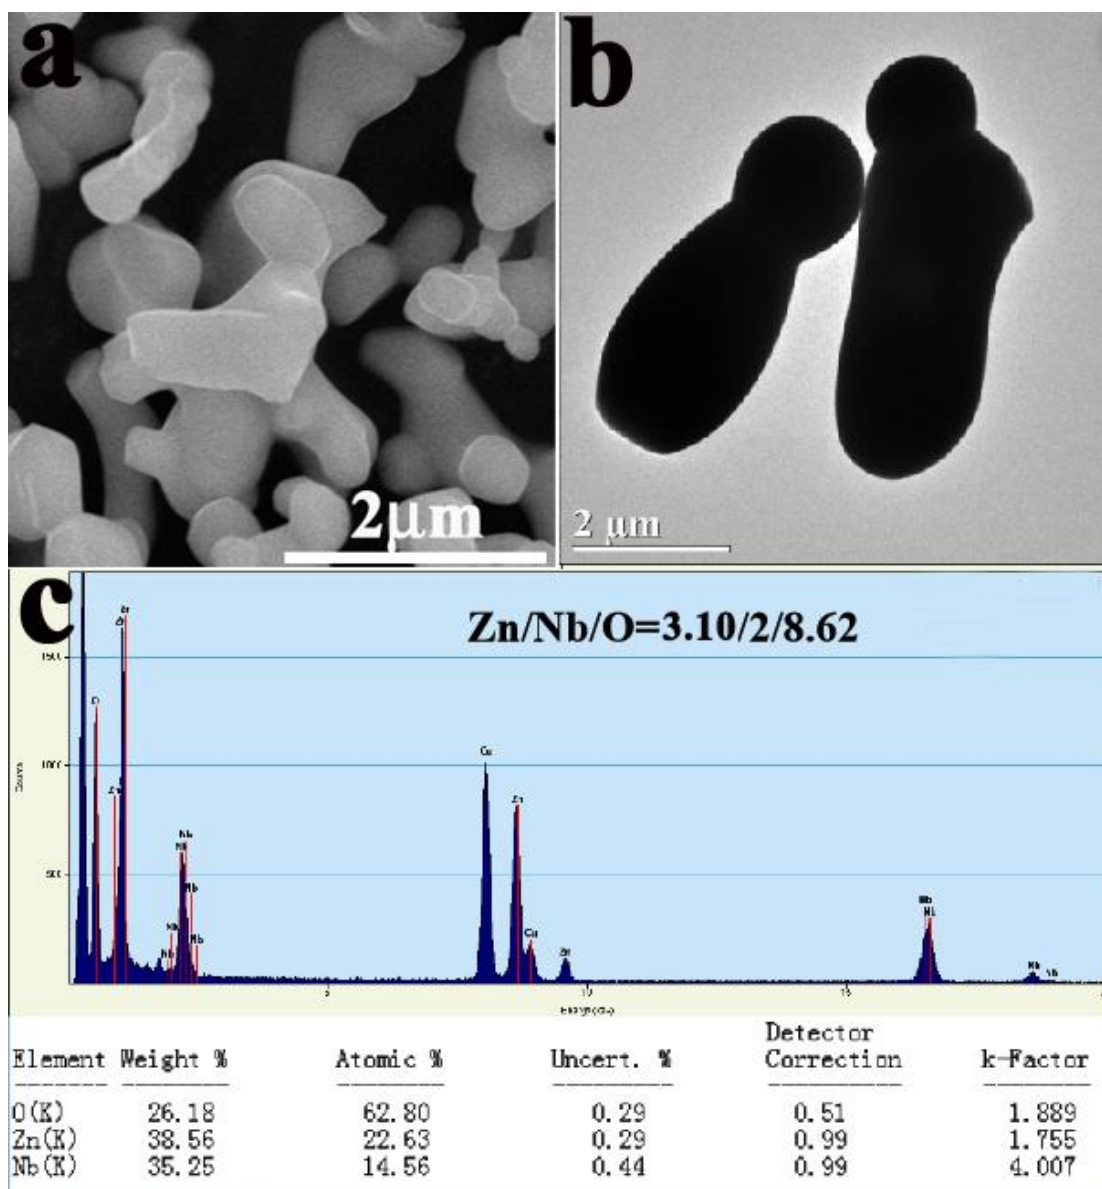

**Fig. S1.** SEM image (a) and TEM image (b), and EDS analysis (c) of as-obtained pure  $\text{Zn}_3\text{Nb}_2\text{O}_8$ .

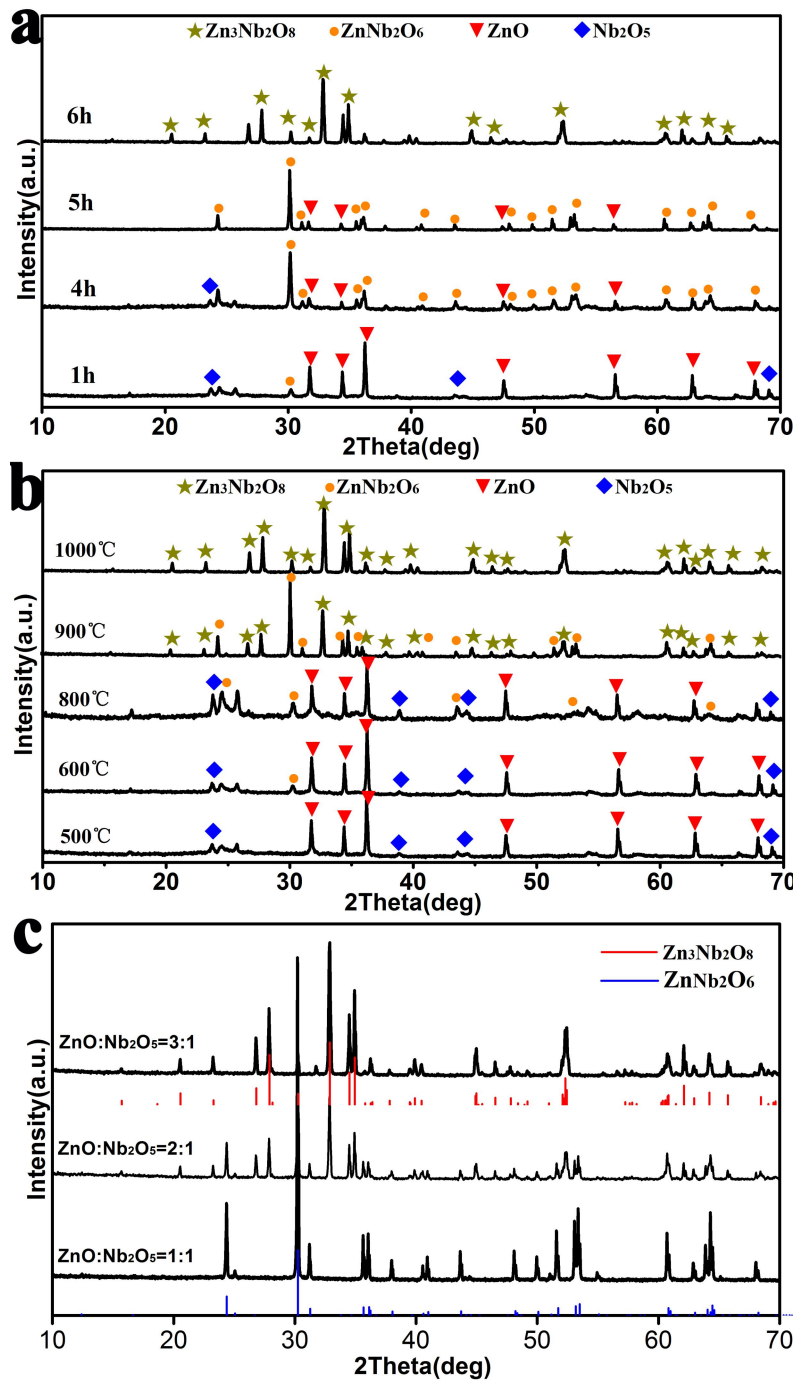

**Fig. S2.** XRD patterns of as-prepared products in typical synthesis with different duration (a), temperature (b) and the ratio of raw materials (c).

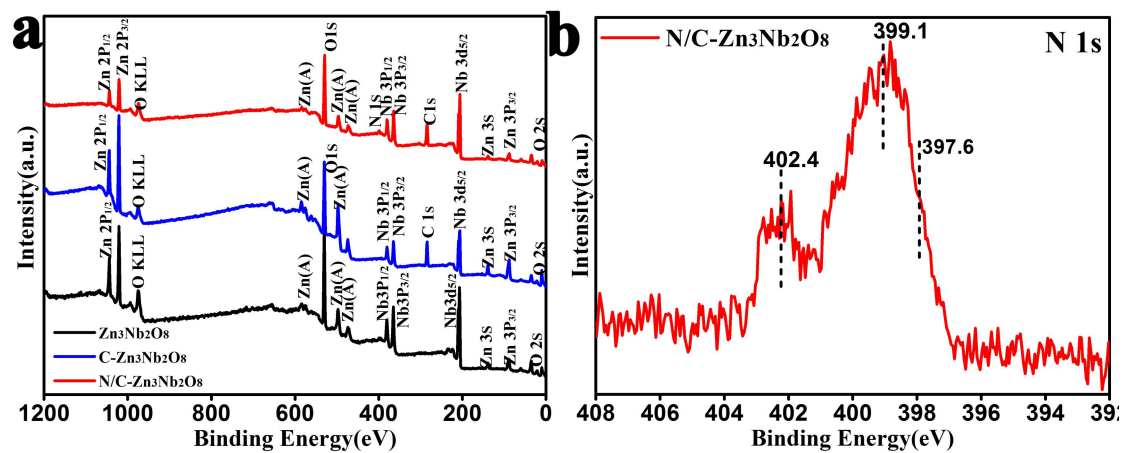

**Fig. S3.** (a) Full XPS spectrum of the as-prepared photocatalysts. The black, blue and red lines represent bare  $\text{Zn}_3\text{Nb}_2\text{O}_8$ , carbon doped  $\text{Zn}_3\text{Nb}_2\text{O}_6$ , and nitrogen (10wt.%) and carbon co-doped  $\text{Zn}_3\text{Nb}_2\text{O}_8$ , respectively. (b) XPS spectra of N 1s of N/C co-doped  $\text{Zn}_3\text{Nb}_2\text{O}_8$ .

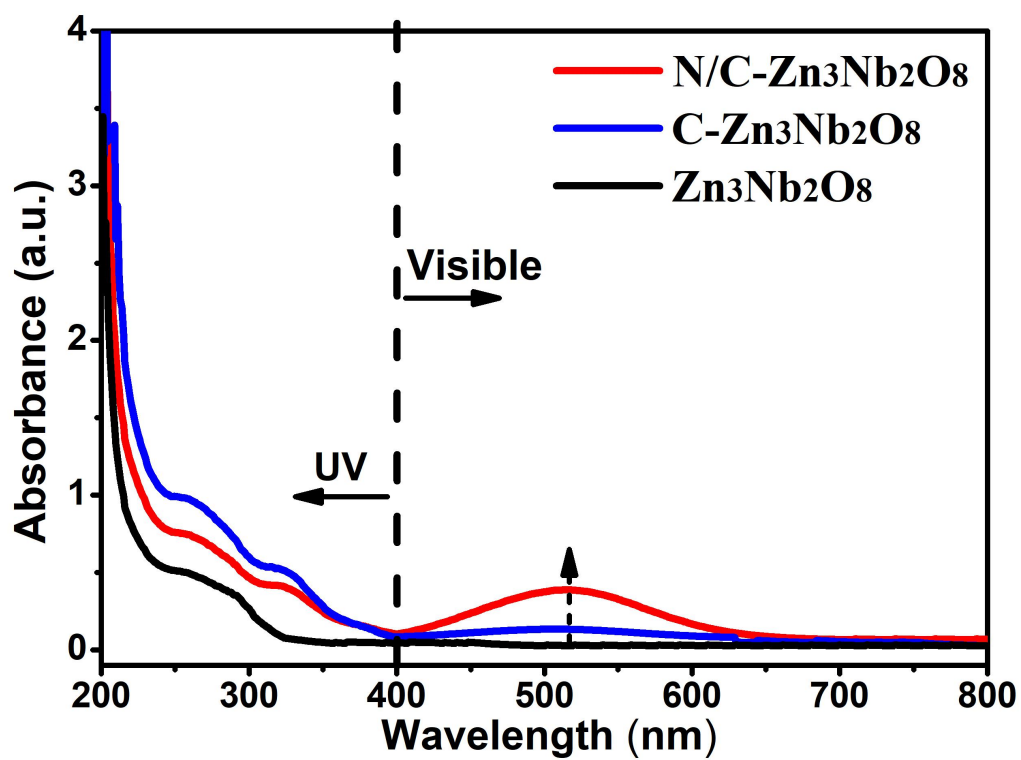

**Fig. S4.** UV-vis spectrum with the filter of UV elimination ( $\lambda \geq 400$  nm) of as-prepared bare Zn<sub>3</sub>Nb<sub>2</sub>O<sub>8</sub>, C-Zn<sub>3</sub>Nb<sub>2</sub>O<sub>8</sub> and N/C-Zn<sub>3</sub>Nb<sub>2</sub>O<sub>8</sub> catalysts.

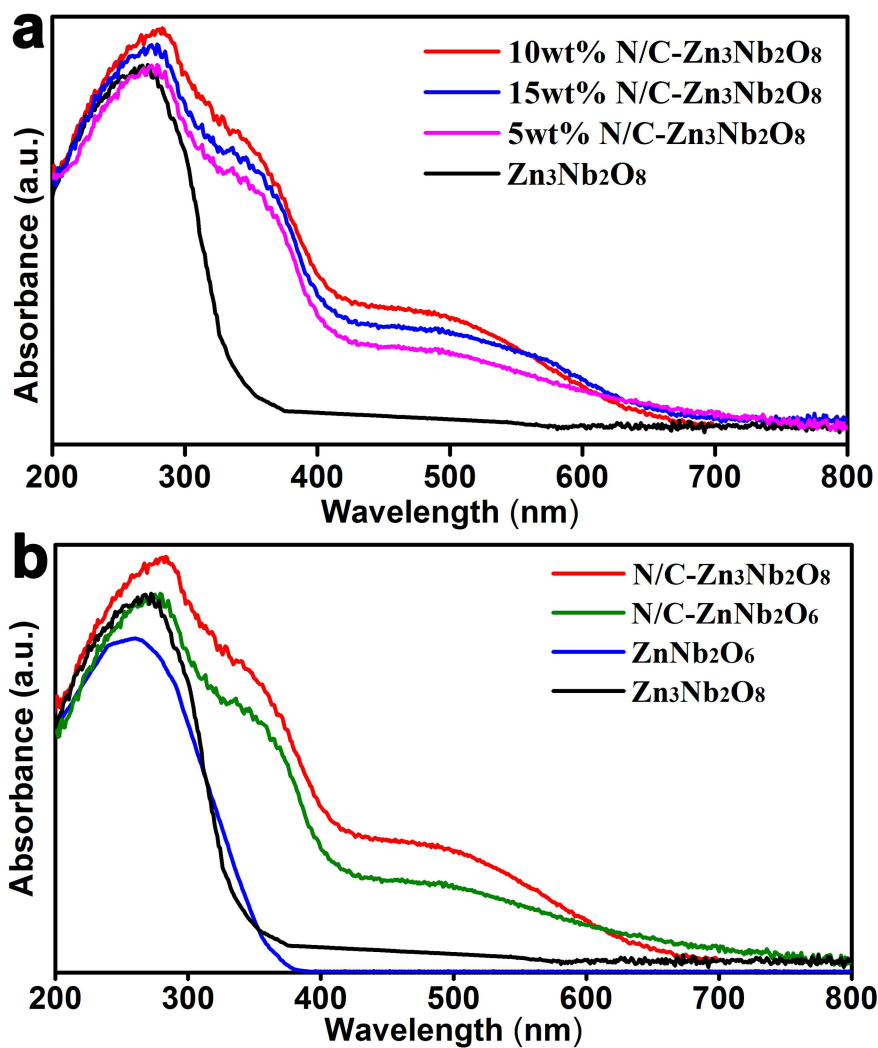

**Fig. S5.** UV-vis absorption spectra of (a) pure  $Zn_3Nb_2O_8$ , N/C-doped  $Zn_3Nb_2O_8$  with different nitrogen doping concentration, and (b) pure  $ZnNb_2O_6$ , bare  $Zn_3Nb_2O_8$  and their corresponding nitrogen (10 wt.%) and carbon co-doped samples.

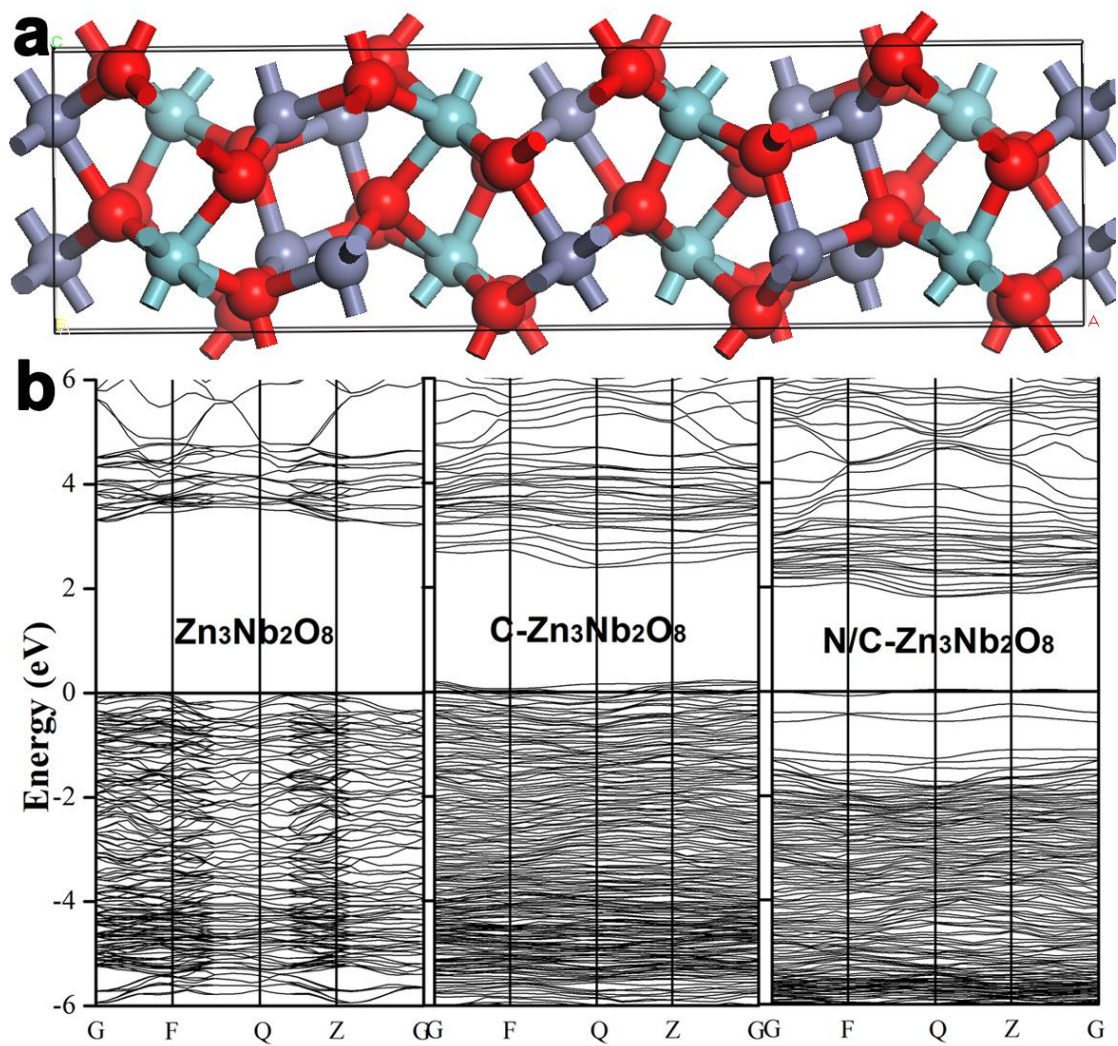

**Fig. S6.** (a) Lattice structure graph of pure  $\text{Zn}_3\text{Nb}_2\text{O}_8$ , and (b) band structures of  $\text{Zn}_3\text{Nb}_2\text{O}_8$ , C doped  $\text{Zn}_3\text{Nb}_2\text{O}_8$ , C and N co-doped  $\text{Zn}_3\text{Nb}_2\text{O}_8$ .

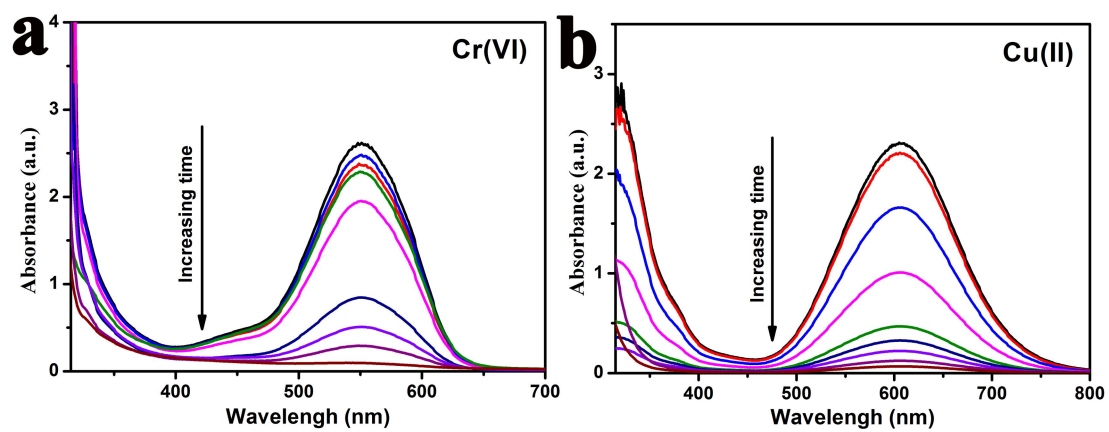

**Fig. S7.** UV-vis spectral changes of Cr(VI) (a) and Cu(II) (b) in the present of N/C-Zn<sub>3</sub>Nb<sub>2</sub>O<sub>8</sub> catalysts with the increase of visible light irradiation time.



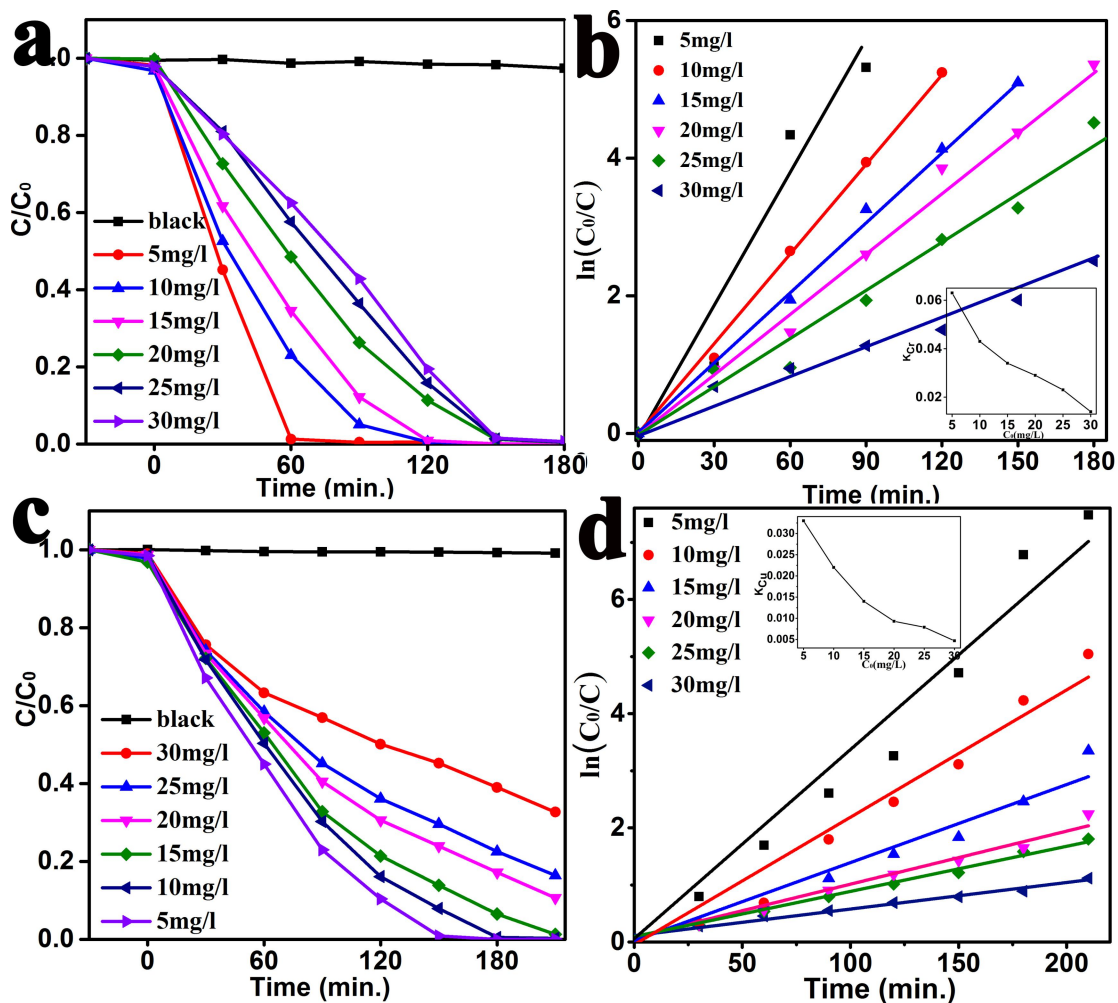

**Fig. S8.** Reduction efficiency of Cr (VI) (a) and Cu (II) (c), and liner transform  $\ln C_0/C$  of the removal of Cr(VI) (b) and Cu (II) (d) over C and N co-doped Zn<sub>3</sub>Nb<sub>2</sub>O<sub>8</sub> catalysts at different initial concentrations. Inset in b and d is the reduction rate at different initial Cr(VI) and Cu (II) concentrations, respectively.

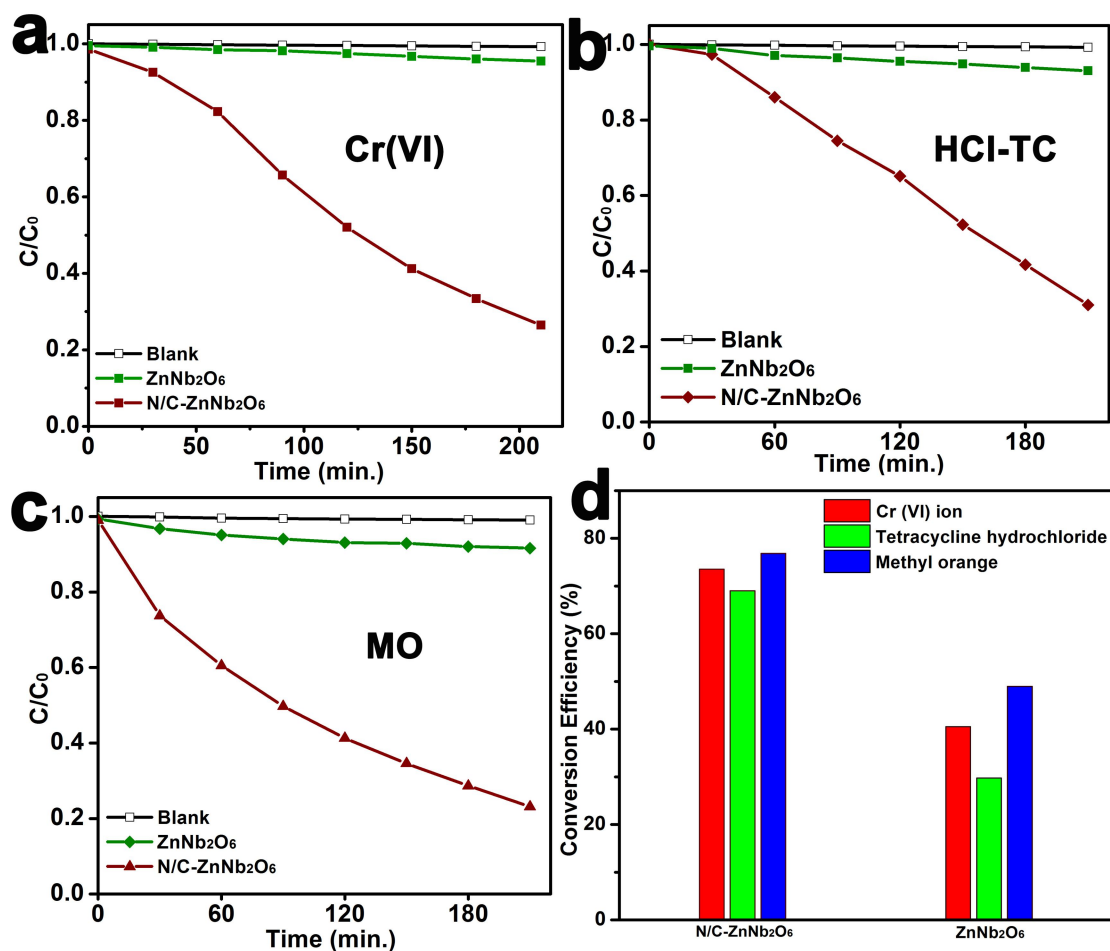

**Fig. S9.** The concentration changes of Cr (VI) ion (a), tetracycline hydrochloride (b), and methyl orange (c) as a function of visible light irradiation time in the present of pure ZnNb<sub>2</sub>O<sub>6</sub> and N/C co-doped ZnNb<sub>2</sub>O<sub>6</sub>, and conversion efficiencies in initial 210 min for different photocatalysts (d).

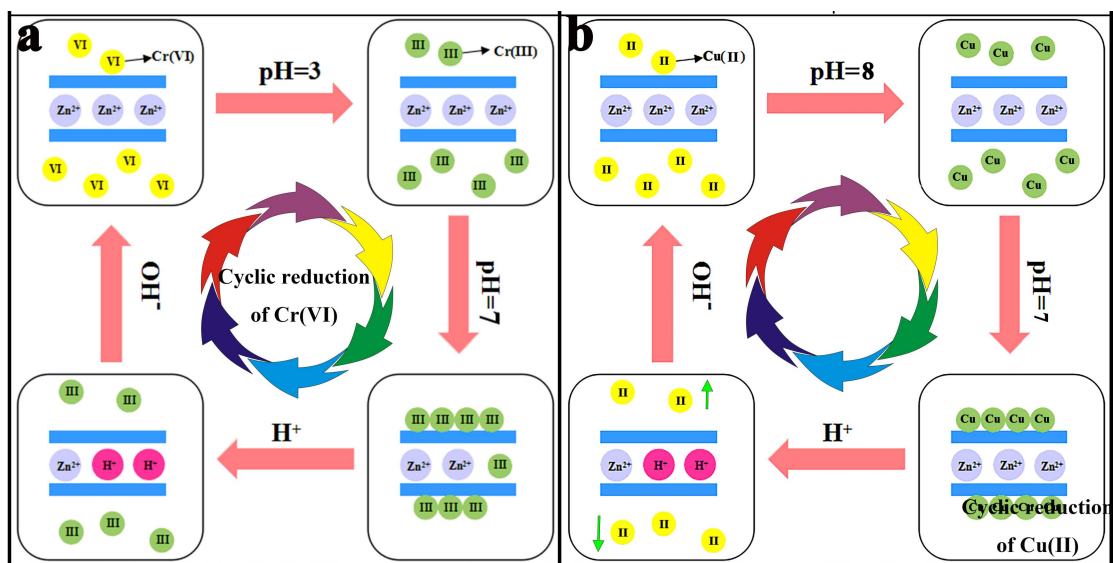

**Fig. S10.** The schematic diagram for the disposal of chromium species (a) and copper species (b) and the regeneration process of N/C-Zn<sub>3</sub>Nb<sub>2</sub>O<sub>8</sub>.
